# Supplementary material for: Diverse life histories and childhood socialization during the middle and late Dawenkou period: Incremental dentin isotope evidence from the Jiaojia site, China
Source: Research Square preprint supplement (doi:10.21203/rs.3.rs-8504291/v1), 2026-01-13
Supplement: Supplementary file 1 [file 4e35a3f5fb6472677a64f8c6.docx]

# Supplementary material

## **Table S1**

Stable isotope data of human bone and dentin samples from the Jiaojia site.

| **Units** | **Element** | **Sample and section number** | **Distance (mm)** | **Root / Crown** | **Estimated age range (yrs)** | **Estimated median age (yrs)** | ***δ*13C (‰)** | ***δ*15N (‰)** | **C**% | **N**% | **Atomic C:N** |
| --- | --- | --- | --- | --- | --- | --- | --- | --- | --- | --- | --- |
| M57 | Upper left first molar (ULM1) | M57-1 | 1 | Crown | 0.3–0.9 | 0.6 | −8.9 | 13.2 | 42.8 | 14.7 | 3.4 |
|  | M57-2 | 2 | Crown | 0.9–1.6 | 1.3 | −9.6 | 12.2 | 42.5 | 14.6 | 3.4 |
|  | M57-3 | 3 | Crown | 1.6–2.2 | 1.9 | −10.2 | 11.4 | 42.2 | 14.5 | 3.4 |
|  | M57-4 | 4 | Crown | 2.2–2.9 | 2.6 | −10.4 | 11.1 | 42.0 | 14.4 | 3.4 |
|  | M57-5 | 5 | Crown | 2.9–3.5 | 3.2 | −10.6 | 10.4 | 41.2 | 14.5 | 3.3 |
|  | M57-6 | 6 | Root | 3.5–4.0 | 3.8 | −9.9 | 10.5 | 42.3 | 14.5 | 3.4 |
|  | M57-7 | 8 | Root | 4.0–4.9 | 4.5 | −10.5 | 10.5 | 41.4 | 14.3 | 3.4 |
|  | M57-8 | 10 | Root | 4.9–5.8 | 5.4 | −10.6 | 10.4 | 41.4 | 14.5 | 3.3 |
|  | M57-9 | 12 | Root | 5.8–6.7 | 6.3 | −9.2 | 10.6 | 42.1 | 14.5 | 3.4 |
|  | M57-10 | 14 | Root | 6.7–7.7 | 7.2 | −9.7 | 10.7 | 41.6 | 14.6 | 3.3 |
|  | M57-11 | 16 | Root | 7.7–8.6 | 8.2 | −10.1 | 10.8 | 41.7 | 14.6 | 3.3 |
|  | M57-12 | 18 | Root | 8.6–9.5 | 9.1 | −10.7 | 10.7 | 41.7 | 14.6 | 3.3 |
|  | ulna | M57-a |  |  | 10–20 before death |  | −9.2 | 10.1 | 42.5 | 15.4 | 3.2 |
|  | rib | M57-b |  |  | 2–5 before death |  | −8.8 | 10.0 | 43.4 | 15.4 | 3.3 |
| M98 | Upper right canine (URC) | M98-1 | 1 | Crown | 0.6–1.4 | 1.0 | −8.8 | 12.0 | 42.8 | 12.9 | 3.9 |
|  | M98-2 | 2 | Crown | 1.4–2.2 | 1.8 | −10.7 | 12.0 | 43.3 | 15.2 | 3.3 |
|  | M98-3 | 3 | Crown | 2.2–3.1 | 2.7 | −13.0 | 11.5 | 42.5 | 14.7 | 3.4 |
|  | M98-4 | 4 | Crown | 3.1–3.9 | 3.5 | −8.9 | 13.1 | 44.9 | 16.0 | 3.3 |
|  | M98-5 | 5 | Crown | 3.9–4.7 | 4.3 | −14.3 | 11.6 | 41.6 | 12.2 | 4.0 |
|  | M98-6 | 6 | Crown | 4.7–5.5 | 5.1 | −11.7 | 11.6 | 42.9 | 15.0 | 3.3 |
|  | M98-7 | 8 | Root | 5.5–6.8 | 6.2 | −12.7 | 11.1 | 43.0 | 14.9 | 3.4 |
|  | M98-8 | 10 | Root | 6.8–8.1 | 7.5 | −12.4 | 10.5 | 41.9 | 14.3 | 3.4 |
|  | M98-9 | 12 | Root | 8.1–9.4 | 8.8 | −11.5 | 11.1 | 42.6 | 14.8 | 3.4 |
|  | M98-10 | 14 | Root | 9.4–10.6 | 10.0 | −11.2 | 11.1 | 40.7 | 14.2 | 3.3 |
|  | M98-11 | 16 | Root | 10.6–11.9 | 11.3 | −11.3 | 11.0 | 43.1 | 15.1 | 3.3 |
|  | M98-12 | 18 | Root | 11.9–13.2 | 12.6 | −10.9 | 11.0 | 42.1 | 14.8 | 3.3 |
|  | M98-13 | 20 | Root | 13.2–14.5 | 13.9 | −12.9 | 11.6 | 40.8 | 14.5 | 3.3 |
|  | radius | M98-a |  |  | 10–20 before death |  | −10.1 | 10.4 | 41.3 | 14.9 | 3.2 |
|  | rib | M98-b |  |  | 2–5 before death |  | −11.1 | 10.3 | 41.7 | 15.0 | 3.2 |
| M124 | Upper left first molar (ULM1) | M124-1 | 1 | Crown | 0.3–0.9 | 0.6 | −9.1 | 13.0 | 41.7 | 14.6 | 3.3 |
|  | M124-2 | 2 | Crown | 0.9–1.6 | 1.3 | −9.5 | 12.0 | 41.6 | 14.8 | 3.3 |
|  | M124-3 | 3 | Crown | 1.6–2.2 | 1.9 | −10.2 | 11.9 | 40.8 | 14.2 | 3.4 |
|  | M124-4 | 4 | Crown | 2.2–2.9 | 2.6 | −11.0 | 11.5 | 41.3 | 14.7 | 3.3 |
|  | M124-5 | 5 | Crown | 2.9–3.5 | 3.2 | −11.2 | 10.9 | 42.4 | 15.0 | 3.3 |
|  | M124-6 | 6 | Root | 3.5–4.0 | 3.8 | −12.0 | 10.4 | 42.0 | 14.8 | 3.3 |
|  | M124-7 | 8 | Root | 4.0–4.9 | 4.5 | −12.2 | 10.5 | 42.0 | 15.0 | 3.3 |
|  | M124-8 | 10 | Root | 4.9–5.8 | 5.4 | −12.2 | 10.7 | 41.7 | 14.8 | 3.3 |
|  | M124-9 | 12 | Root | 5.8–6.7 | 6.3 | −11.6 | 10.9 | 42.1 | 15.2 | 3.2 |
|  | M124-10 | 14 | Root | 6.7–7.7 | 7.2 | −11.8 | 11.3 | 40.9 | 14.7 | 3.3 |
|  | M124-11 | 16 | Root | 7.7–8.6 | 8.2 | −11.5 | 11.1 | 41.9 | 15.1 | 3.2 |
|  | M124-12 | 18 | Root | 8.6–9.5 | 9.1 | −11.1 | 10.7 | 42.2 | 15.4 | 3.2 |
|  | ulna | M124-a |  |  | 10–20 before death |  | −11.5 | 10.4 | 42.5 | 15.3 | 3.2 |
|  | rib | M124-b |  |  | 2–5 before death |  | −11.8 | 8.8 | 33.6 | 12.4 | 3.2 |
| M10 | Upper left first incisor (ULI1) | M10-1 | 1 | Crown | 0.5–1.2 | 0.9 | −10.6 | 12.6 | 41.2 | 14.2 | 3.4 |
|  | M10-2 | 2 | Crown | 1.2–1.8 | 1.5 | −10.1 | 11.5 | 41.8 | 14.8 | 3.3 |
|  | M10-3 | 3 | Crown | 1.8–2.5 | 2.2 | −11.0 | 10.7 | 42.5 | 15.0 | 3.3 |
|  | M10-4 | 4 | Crown | 2.5–3.2 | 2.9 | −10.7 | 10.6 | 42.3 | 14.7 | 3.4 |
|  | M10-5 | 5 | Crown | 3.2–3.8 | 3.5 | −11.2 | 10.8 | 41.5 | 14.5 | 3.3 |
|  | M10-6 | 6 | Crown | 3.8–4.5 | 4.2 | −10.9 | 10.8 | 40.6 | 14.1 | 3.3 |
|  | M10-7 | 8 | Root | 4.5–5.2 | 4.9 | −9.0 | 11.1 | 41.6 | 14.5 | 3.3 |
|  | M10-8 | 10 | Root | 5.2–5.9 | 5.6 | −9.7 | 11.2 | 41.2 | 14.7 | 3.3 |
|  | M10-9 | 12 | Root | 5.9–6.6 | 6.3 | −9.5 | 10.4 | 41.7 | 14.6 | 3.3 |
|  | M10-10 | 14 | Root | 6.6–7.4 | 7.0 | −8.2 | 9.6 | 41.9 | 14.9 | 3.3 |
|  | M10-11 | 16 | Root | 7.4–8.1 | 7.8 | −8.5 | 9.5 | 40.3 | 14.2 | 3.3 |
|  | M10-12 | 18 | Root | 8.1–8.8 | 8.5 | −7.3 | 9.6 | 40.6 | 14.2 | 3.3 |
|  | M10-13 | 20 | Root | 8.8–9.5 | 9.2 | −8.0 | 9.2 | 40.3 | 14.2 | 3.3 |
|  | radius | M10-a |  |  | 10–20 before death |  | −8.6 | 6.8 | 37.8 | 14.7 | 3.0 |
|  | rib | M10-b |  |  | 2–5 before death |  | −8.8 | 9.1 | 39.7 | 14.1 | 3.3 |
| M78 | Upper right canine (URC) | M78-1 | 1 | Crown | 0.6–1.4 | 1.0 | −15.2 | 13.0 | 73.6 | 10.0 | 8.6 |
|  | M78-2 | 2 | Crown | 1.4–2.2 | 1.8 | −10.3 | 13.3 | 41.3 | 13.5 | 3.6 |
|  | M78-3 | 3 | Crown | 2.2–3.1 | 2.7 | −9.1 | 12.9 | 40.9 | 14.4 | 3.3 |
|  | M78-4 | 4 | Crown | 3.1–3.9 | 3.5 | −9.0 | 11.9 | 41.0 | 14.3 | 3.4 |
|  | M78-5 | 5 | Crown | 3.9–4.7 | 4.3 | −10.4 | 10.9 | 40.9 | 14.2 | 3.3 |
|  | M78-6 | 6 | Crown | 4.7–5.5 | 5.1 | −10.1 | 10.6 | 41.0 | 14.5 | 3.3 |
|  | M78-7 | 8 | Root | 5.5–6.6 | 6.1 | −9.7 | 10.5 | 41.3 | 14.5 | 3.3 |
|  | M78-8 | 10 | Root | 6.6–7.8 | 7.2 | −10.7 | 10.3 | 41.7 | 14.6 | 3.3 |
|  | M78-9 | 12 | Root | 7.8–8.9 | 8.4 | −9.5 | 10.4 | 42.1 | 15.0 | 3.3 |
|  | M78-10 | 14 | Root | 8.9–10.0 | 9.5 | −10.3 | 9.8 | 41.6 | 14.7 | 3.3 |
|  | M78-11 | 16 | Root | 10.0–11.1 | 10.6 | −9.0 | 10.5 | 41.1 | 14.5 | 3.3 |
|  | M78-12 | 18 | Root | 11.1–12.3 | 11.7 | −8.9 | 10.7 | 41.4 | 14.6 | 3.3 |
|  | M78-13 | 20 | Root | 12.3–13.4 | 12.9 | −9.9 | 10.1 | 41.3 | 14.5 | 3.3 |
|  | M78-14 | 22 | Root | 13.4–14.5 | 14.0 | −11.9 | 10.8 | 40.1 | 13.4 | 3.5 |
|  | fibula | M78-a |  |  | 10–20 before death |  | −8.7 | 10.1 | 43.3 | 15.5 | 3.3 |
|  | rib | M78-b |  |  | 2–5 before death |  | −9.1 | 8.8 | 35.4 | 13.1 | 3.1 |
| M127 | Upper left canine (ULC) | M127-1 | 1 | Crown | 0.6–1.4 | 1.0 | −8.3 | 11.9 | 39.7 | 13.2 | 3.5 |
|  | M127-2 | 2 | Crown | 1.4–2.2 | 1.8 | −8.0 | 11.6 | 41.1 | 14.0 | 3.4 |
|  | M127-3 | 3 | Crown | 2.2–3.1 | 2.7 | −8.7 | 11.1 | 41.3 | 14.1 | 3.4 |
|  | M127-4 | 4 | Crown | 3.1–3.9 | 3.5 | −9.0 | 10.4 | 41.2 | 14.3 | 3.4 |
|  | M127-5 | 5 | Crown | 3.9–4.7 | 4.3 | −8.4 | 10.9 | 41.1 | 14.3 | 3.4 |
|  | M127-6 | 6 | Crown | 4.7–5.5 | 5.1 | −8.7 | 10.9 | 41.0 | 14.3 | 3.3 |
|  | M127-7 | 8 | Root | 5.5–6.6 | 6.1 | −8.5 | 10.2 | 41.0 | 14.4 | 3.3 |
|  | M127-8 | 10 | Root | 6.6–7.8 | 7.2 | −8.0 | 9.9 | 40.1 | 14.0 | 3.3 |
|  | M127-9 | 12 | Root | 7.8–8.9 | 8.4 | −7.9 | 9.3 | 40.7 | 14.4 | 3.3 |
|  | M127-10 | 14 | Root | 8.9–10.0 | 9.5 | −6.3 | 9.4 | 38.8 | 13.5 | 3.4 |
|  | M127-11 | 16 | Root | 10.0–11.1 | 10.6 | −6.3 | 8.8 | 40.2 | 14.9 | 3.1 |
|  | M127-12 | 18 | Root | 11.1–12.3 | 11.7 | −7.0 | 9.3 | 41.5 | 15.4 | 3.1 |
|  | M127-13 | 20 | Root | 12.3–13.4 | 12.9 | −7.5 | 9.2 | 40.3 | 14.8 | 3.2 |
|  | M127-14 | 22 | Root | 13.4–14.5 | 14.0 | −8.3 | 9.6 | 41.2 | 14.9 | 3.2 |
|  | radius | M127-a |  |  | 10–20 before death |  | −8.1 | 8.8 | 42.4 | 15.1 | 3.3 |
|  | rib | M127-b |  |  | 2–5 before death |  | −9.3 | 9.5 | 40.4 | 14.6 | 3.2 |
| M130 | Lower left first molar (LLM1) | M130-1 | 1 | Crown | 0.3–0.9 | 0.6 | −10.6 | 9.6 | 43.7 | 16.3 | 3.1 |
|  | M130-2 | 2 | Crown | 0.9–1.6 | 1.3 | −11.3 | 10.7 | 41.6 | 15.5 | 3.1 |
|  | M130-3 | 3 | Crown | 1.6–2.2 | 1.9 | −11.7 | 10.5 | 41.4 | 15.6 | 3.1 |
|  | M130-4 | 4 | Crown | 2.2–2.9 | 2.6 | −11.8 | 10.3 | 41.7 | 15.4 | 3.2 |
|  | M130-5 | 5 | Crown | 2.9–3.5 | 3.2 | −11.5 | 9.9 | 41.4 | 15.6 | 3.1 |
|  | M130-6 | 6 | Root | 3.5–4.0 | 3.8 | −12.2 | 9.2 | 41.2 | 15.1 | 3.2 |
|  | M130-7 | 8 | Root | 4.0–5.0 | 4.5 | −12.1 | 9.1 | 41.1 | 15.4 | 3.1 |
|  | M130-8 | 10 | Root | 5.0–6.0 | 5.5 | −11.7 | 9.3 | 41.1 | 15.3 | 3.1 |
|  | M130-9 | 12 | Root | 6.0–7.0 | 6.5 | −11.2 | 9.7 | 40.4 | 15.0 | 3.1 |
|  | M130-10 | 14 | Root | 7.0–8.0 | 7.5 | −10.5 | 8.4 | 40.5 | 15.2 | 3.1 |
|  | M130-11 | 16 | Root | 8.0–9.0 | 8.5 | −11.7 | 11.4 | 39.5 | 14.8 | 3.1 |
|  | M130-12 | 18 | Root | 9.0–10.0 | 9.5 | −10.0 | 9.4 | 41.6 | 15.6 | 3.1 |
|  | radius | M130-a |  |  | 10–20 before death |  | −9.5 | 8.9 | 41.3 | 14.7 | 3.3 |
|  | rib | M130-b |  |  | 2–5 before death |  | −9.6 | 10.0 | 43.1 | 15.2 | 3.3 |
| M133 | Upper left first molar (ULM1) | M133-1 | 1 | Crown | 0.3–0.9 | 0.6 | −9.4 | 11.3 | 41.4 | 15.4 | 3.1 |
|  | M133-2 | 2 | Crown | 0.9–1.6 | 1.3 | −10.0 | 10.3 | 42.0 | 15.5 | 3.2 |
|  | M133-3 | 3 | Crown | 1.6–2.2 | 1.9 | −10.2 | 9.2 | 41.7 | 15.6 | 3.1 |
|  | M133-4 | 4 | Crown | 2.2–2.9 | 2.6 | −11.0 | 9.2 | 41.0 | 15.5 | 3.1 |
|  | M133-5 | 5 | Crown | 2.9–3.5 | 3.2 | −11.2 | 8.6 | 40.8 | 15.5 | 3.1 |
|  | M133-6 | 6 | Root | 3.5–4.0 | 3.8 | −11.2 | 8.6 | 40.8 | 15.3 | 3.1 |
|  | M133-7 | 8 | Root | 4.0–4.9 | 4.5 | −9.4 | 8.4 | 40.9 | 15.0 | 3.2 |
|  | M133-8 | 10 | Root | 4.9–5.8 | 5.4 | −11.3 | 9.8 | 42.7 | 15.4 | 3.2 |
|  | M133-9 | 12 | Root | 5.8–6.7 | 6.3 | −10.2 | 8.4 | 40.7 | 14.9 | 3.2 |
|  | M133-10 | 14 | Root | 6.7–7.7 | 7.2 | −9.7 | 8.4 | 40.6 | 14.7 | 3.2 |
|  | M133-11 | 16 | Root | 7.7–8.6 | 8.2 | −9.7 | 8.8 | 41.1 | 15.1 | 3.2 |
|  | M133-12 | 18 | Root | 8.6–9.5 | 9.1 | −9.7 | 9.4 | 41.6 | 15.1 | 3.2 |
|  | ulna | M133-a |  |  | 10–20 before death |  | −9.0 | 8.3 | 41.6 | 14.9 | 3.3 |
|  | rib | M133-b |  |  | 2–5 before death |  | −9.3 | 8.7 | 41.0 | 14.5 | 3.3 |
| M191 | Upper right canine (URC) | M191-1 | 1 | Crown | 0.6–1.4 | 1.0 | −11.2 | 15.1 | 43.7 | 12.3 | 4.1 |
|  | M191-2 | 2 | Crown | 1.4–2.2 | 1.8 | −8.9 | 12.3 | 40.5 | 14.4 | 3.3 |
|  | M191-3 | 3 | Crown | 2.2–3.1 | 2.7 | −9.1 | 11.7 | 40.8 | 14.8 | 3.2 |
|  | M191-4 | 4 | Crown | 3.1–3.9 | 3.5 | −9.0 | 11.3 | 40.6 | 14.7 | 3.2 |
|  | M191-5 | 5 | Crown | 3.9–4.7 | 4.3 | −8.6 | 11.1 | 40.6 | 14.7 | 3.2 |
|  | M191-6 | 6 | Crown | 4.7–5.5 | 5.1 | −8.1 | 10.7 | 41.0 | 14.8 | 3.2 |
|  | M191-7 | 8 | Root | 5.5–6.8 | 6.2 | −8.9 | 10.8 | 40.7 | 14.8 | 3.2 |
|  | M191-8 | 10 | Root | 6.8–8.1 | 7.5 | −9.8 | 10.2 | 42.3 | 15.2 | 3.3 |
|  | M191-9 | 12 | Root | 8.1–9.4 | 8.8 | −10.2 | 10.2 | 42.5 | 15.2 | 3.3 |
|  | M191-10 | 14 | Root | 9.4–10.6 | 10.0 | −10.0 | 10.4 | 42.3 | 14.7 | 3.3 |
|  | M191-11 | 16 | Root | 10.6–11.9 | 11.3 | −10.2 | 10.1 | 42.6 | 15.0 | 3.3 |
|  | M191-12 | 18 | Root | 11.9–13.2 | 12.6 | −8.2 | 11.1 | 42.5 | 14.9 | 3.3 |
|  | M191-13 | 20 | Root | 13.2–14.5 | 13.9 | −8.0 | 11.1 | 43.0 | 14.4 | 3.5 |
|  | ulna | M191-a |  |  | 10–20 before death |  | −9.2 | 8.9 | 41.5 | 15.1 | 3.2 |
|  | rib | M191-b |  |  | 2–5 before death |  | −10.0 | 8.5 | 38.1 | 13.9 | 3.2 |
| M20 | Lower left first molar (LLM1) | M20-1 | 1 | Crown | 0.3–0.9 | 0.6 | −8.7 | 13.3 | 42.1 | 16.4 | 3.0 |
|  | M20-2 | 2 | Crown | 0.9–1.6 | 1.3 | −8.9 | 12.6 | 42.4 | 16.2 | 3.1 |
|  | M20-3 | 3 | Crown | 1.6–2.2 | 1.9 | −8.5 | 12.6 | 42.6 | 16.6 | 3.0 |
|  | M20-4 | 4 | Crown | 2.2–2.9 | 2.6 | −9.3 | 11.8 | 42.8 | 16.5 | 3.0 |
|  | M20-5 | 5 | Crown | 2.9–3.5 | 3.2 | −9.9 | 11.5 | 42.7 | 16.6 | 3.0 |
|  | M20-6 | 6 | Root | 3.5–4.0 | 3.8 | −10.1 | 10.7 | 42.1 | 16.0 | 3.1 |
|  | M20-7 | 8 | Root | 4.0–5.0 | 4.5 | −9.8 | 10.4 | 42.9 | 16.9 | 3.0 |
|  | M20-8 | 10 | Root | 5.0–6.0 | 5.5 | −9.5 | 10.4 | 42.5 | 16.6 | 3.0 |
|  | M20-9 | 12 | Root | 6.0–7.0 | 6.5 | −9.9 | 10.7 | 41.0 | 15.6 | 3.1 |
|  | M20-10 | 14 | Root | 7.0–8.0 | 7.5 | −9.8 | 10.7 | 41.9 | 16.0 | 3.0 |
|  | M20-11 | 16 | Root | 8.0–9.0 | 8.5 | −9.2 | 10.3 | 42.2 | 16.5 | 3.0 |
|  | M20-12 | 18 | Root | 9.0–10.0 | 9.5 | −9.0 | 10.2 | 42.2 | 16.2 | 3.0 |
|  | radius | M20-a |  |  | 10–20 before death |  | −8.3 | 9.4 | 42.9 | 15.1 | 3.3 |
|  | rib | M20-b |  |  | 2–5 before death |  | −7.7 | 9.6 | 43.1 | 15.3 | 3.3 |
| M173 | Upper left first molar (ULM1) | M173-1 | 1 | Crown | 0.3–0.9 | 0.6 | −8.6 | 13.3 | 41.7 | 15.2 | 3.2 |
|  | M173-2 | 2 | Crown | 0.9–1.6 | 1.3 | −8.6 | 13.4 | 41.7 | 15.3 | 3.2 |
|  | M173-3 | 3 | Crown | 1.6–2.2 | 1.9 | −9.6 | 12.4 | 41.9 | 15.2 | 3.2 |
|  | M173-4 | 4 | Crown | 2.2–2.9 | 2.6 | −9.9 | 11.9 | 40.8 | 15.2 | 3.1 |
|  | M173-5 | 5 | Crown | 2.9–3.5 | 3.2 | −10.7 | 10.9 | 41.2 | 15.2 | 3.2 |
|  | M173-6 | 6 | Root | 3.5–4.0 | 3.8 | −10.5 | 11.4 | 41.1 | 15.1 | 3.2 |
|  | M173-7 | 7 | Root | 4.0–4.5 | 4.3 | −10.6 | 11.1 | 41.5 | 15.4 | 3.1 |
|  | M173-8 | 9 | Root | 4.5–5.5 | 5.0 | −11.2 | 10.9 | 40.9 | 15.1 | 3.2 |
|  | M173-9 | 11 | Root | 5.5–6.5 | 6.0 | −11.5 | 10.7 | 40.9 | 15.1 | 3.2 |
|  | M173-10 | 13 | Root | 6.5–7.5 | 7.0 | −11.2 | 10.6 | 41.2 | 15.3 | 3.1 |
|  | M173-11 | 15 | Root | 7.5–8.5 | 8.0 | −10.6 | 10.4 | 41.1 | 15.2 | 3.2 |
|  | M173-12 | 17 | Root | 8.5–9.5 | 9.0 | −10.5 | 10.8 | 41.0 | 15.3 | 3.1 |
|  | radius | M173-a |  |  | 10–20 before death |  | −9.0 | 9.5 | 42.0 | 15.2 | 3.2 |
|  | rib | M173-b |  |  | 2–5 before death |  | −8.1 | 9.8 | 43.2 | 15.5 | 3.3 |
| M206 | Lower left first molar (LLM1) | M206-1 | 1 | Crown | 0.9–1.6 | 1.3 | −8.6 | 13.5 | 40.6 | 14.8 | 3.2 |
|  | M206-2 | 2 | Crown | 1.6–2.2 | 1.9 | −9.1 | 11.8 | 41.1 | 15.2 | 3.1 |
|  | M206-3 | 3 | Crown | 2.2–2.9 | 2.6 | −10.2 | 10.8 | 41.6 | 15.3 | 3.2 |
|  | M206-4 | 4 | Crown | 2.9–3.5 | 3.2 | −10.1 | 10.5 | 41.8 | 15.7 | 3.1 |
|  | M206-5 | 5 | Root | 3.5–4.1 | 3.8 | −10.2 | 10.4 | 42.0 | 15.7 | 3.1 |
|  | M206-6 | 6 | Root | 4.1–4.7 | 4.4 | −10.2 | 10.1 | 41.5 | 15.6 | 3.1 |
|  | M206-7 | 7 | Root | 4.7–5.3 | 5.0 | −10.3 | 9.8 | 41.7 | 15.5 | 3.1 |
|  | M206-8 | 9 | Root | 5.3–6.5 | 5.9 | −9.8 | 10.0 | 41.6 | 15.5 | 3.1 |
|  | M206-9 | 11 | Root | 6.5–7.6 | 7.1 | −9.5 | 10.2 | 40.9 | 15.1 | 3.2 |
|  | M206-10 | 13 | Root | 7.6–8.8 | 8.2 | −9.8 | 10.2 | 41.8 | 15.6 | 3.1 |
|  | M206-11 | 15 | Root | 8.8–10.0 | 9.4 | −10.4 | 10.4 | 41.5 | 15.2 | 3.2 |
|  | ulna | M206-a |  |  | 10–20 before death |  | −8.9 | 9.4 | 42.3 | 15.2 | 3.2 |
|  | rib | M206-b |  |  | 2–5 before death |  | −8.9 | 9.6 | 42.7 | 15.4 | 3.2 |
| M22 | Lower right first molar (LRM1) | M22-1 | 1 | Crown | 0.9–1.6 | 1.3 | −8.9 | 11.9 | 42.1 | 16.1 | 3.1 |
|  | M22-2 | 2 | Crown | 1.6–2.2 | 1.9 | −9.3 | 11.8 | 42.1 | 16.3 | 3.0 |
|  | M22-3 | 3 | Crown | 2.2–2.9 | 2.6 | −9.6 | 11.5 | 42.1 | 16.4 | 3.0 |
|  | M22-4 | 4 | Crown | 2.9–3.5 | 3.2 | −9.2 | 11.4 | 42.7 | 16.5 | 3.0 |
|  | M22-5 | 5 | Root | 3.5–4.0 | 3.8 | −9.2 | 11.5 | 42.7 | 16.7 | 3.0 |
|  | M22-6 | 6 | Root | 4.0–4.6 | 4.3 | −8.8 | 11.0 | 42.4 | 16.2 | 3.1 |
|  | M22-7 | 8 | Root | 4.6–5.7 | 5.2 | −8.7 | 11.2 | 42.7 | 16.7 | 3.0 |
|  | M22-8 | 10 | Root | 5.7–6.8 | 6.3 | −8.7 | 11.2 | 42.0 | 16.3 | 3.0 |
|  | M22-9 | 12 | Root | 6.8–7.8 | 7.3 | −8.3 | 11.1 | 41.9 | 16.3 | 3.0 |
|  | M22-10 | 14 | Root | 7.8–8.9 | 8.4 | −7.8 | 10.7 | 42.1 | 16.5 | 3.0 |
|  | M22-11 | 16 | Root | 8.9–10.0 | 9.5 | −8.4 | 10.5 | 42.2 | 16.2 | 3.0 |
|  | radius | M22-a |  |  | 10–20 before death |  | −7.8 | 9.2 | 42.4 | 15.3 | 3.2 |
|  | rib | M22-b |  |  | 2–5 before death |  | −7.6 | 9.5 | 40.6 | 14.5 | 3.3 |
| M25 | Upper left canine (ULC) | M25-1 | 1 | Crown | 0.6–1.4 | 1.0 | −8.5 | 12.5 | 43.4 | 14.5 | 3.5 |
|  | M25-2 | 2 | Crown | 1.4–2.2 | 1.8 | −8.8 | 10.6 | 41.0 | 15.3 | 3.1 |
|  | M25-3 | 3 | Crown | 2.2–3.1 | 2.7 | −8.5 | 10.7 | 41.4 | 15.3 | 3.2 |
|  | M25-4 | 4 | Crown | 3.1–3.9 | 3.5 | −7.9 | 10.4 | 41.4 | 15.5 | 3.1 |
|  | M25-5 | 5 | Crown | 3.9–4.7 | 4.3 | −8.0 | 10.0 | 41.2 | 15.3 | 3.1 |
|  | M25-6 | 6 | Crown | 4.7–5.5 | 5.1 | −8.0 | 9.9 | 41.3 | 15.2 | 3.2 |
|  | M25-7 | 8 | Root | 5.5–6.8 | 6.2 | −7.7 | 9.7 | 41.6 | 15.5 | 3.1 |
|  | M25-8 | 10 | Root | 6.8–8.1 | 7.5 | −7.9 | 9.7 | 41.3 | 15.5 | 3.1 |
|  | M25-9 | 12 | Root | 8.1–9.4 | 8.8 | −7.6 | 9.5 | 41.0 | 15.1 | 3.2 |
|  | M25-10 | 14 | Root | 9.4–10.6 | 10.0 | −7.7 | 9.2 | 41.4 | 15.6 | 3.1 |
|  | M25-11 | 16 | Root | 10.6–11.9 | 11.3 | −7.6 | 9.2 | 41.2 | 15.4 | 3.1 |
|  | M25-12 | 18 | Root | 11.9–13.2 | 12.6 | −7.7 | 9.1 | 41.1 | 15.2 | 3.2 |
|  | M25-13 | 20 | Root | 13.2–14.5 | 13.9 | −8.5 | 9.5 | 41.1 | 15.3 | 3.1 |
|  | fibula | M25-a |  |  | 10–20 before death |  | −7.8 | 8.5 | 40.6 | 14.6 | 3.2 |
|  | rib | M25-b |  |  | 2–5 before death |  | −8.3 | 8.9 | 41.3 | 14.6 | 3.3 |
| M168 | Lower left first molar (LLM1) | M168-1 | 1 | Crown | 0.3–0.9 | 0.6 | −6.0 | 13.3 | 41.8 | 16.1 | 3.0 |
|  | M168-2 | 2 | Crown | 0.9–1.6 | 1.3 | −6.1 | 12.7 | 41.1 | 14.5 | 3.3 |
|  | M168-3 | 3 | Crown | 1.6–2.2 | 1.9 | −6.2 | 12.2 | 42.9 | 16.5 | 3.0 |
|  | M168-4 | 4 | Crown | 2.2–2.9 | 2.6 | −6.7 | 11.4 | 42.5 | 16.3 | 3.0 |
|  | M168-5 | 5 | Crown | 2.9–3.5 | 3.2 | −7.5 | 11.0 | 42.5 | 16.3 | 3.0 |
|  | M168-6 | 6 | Root | 3.5–4.0 | 3.8 | −8.3 | 9.9 | 42.0 | 16.2 | 3.0 |
|  | M168-7 | 7 | Root | 4.0–4.5 | 4.3 | −7.7 | 9.5 | 42.0 | 16.1 | 3.0 |
|  | radius | M168-a |  |  | 10–20 before death |  | −7.6 | 9.3 | 40.6 | 14.6 | 3.2 |
|  | rib | M168-b |  |  | 2–5 before death |  | −7.5 | 9.6 | 41.9 | 15.1 | 3.2 |
| M175 | Lower right canine (LRC) | M175-1 | 1 | Crown | 0.9–1.7 | 1.3 | −10.9 | 10.8 | 10.6 | 3.2 | 3.9 |
|  | M175-2 | 2 | Crown | 1.7–2.4 | 2.1 | −7.8 | 11.6 | 42.6 | 15.1 | 3.3 |
|  | M175-3 | 3 | Crown | 2.4–3.2 | 2.8 | −8.1 | 11.5 | 43.0 | 14.5 | 3.5 |
|  | M175-4 | 4 | Crown | 3.2–4.0 | 3.6 | −6.7 | 11.2 | 41.7 | 15.0 | 3.3 |
|  | M175-5 | 5 | Crown | 4.0–4.7 | 4.4 | −7.3 | 11.3 | 42.4 | 16.4 | 3.0 |
|  | M175-6 | 6 | Crown | 4.7–5.5 | 5.1 | −7.8 | 11.2 | 41.9 | 16.1 | 3.0 |
|  | M175-7 | 7 | Root | 5.5–6.1 | 5.8 | −7.9 | 11.0 | 42.0 | 16.0 | 3.1 |
|  | M175-8 | 9 | Root | 6.1–7.2 | 6.7 | −7.6 | 10.8 | 42.3 | 16.6 | 3.0 |
|  | M175-9 | 11 | Root | 7.2–8.4 | 7.8 | −8.1 | 10.1 | 42.7 | 16.8 | 3.0 |
|  | M175-10 | 13 | Root | 8.4–9.5 | 9.0 | −7.5 | 10.1 | 43.0 | 16.8 | 3.0 |
|  | M175-11 | 15 | Root | 9.5–10.7 | 10.1 | −7.5 | 10.4 | 42.1 | 16.4 | 3.0 |
|  | M175-12 | 17 | Root | 10.7–11.8 | 11.3 | −7.0 | 10.2 | 41.5 | 16.0 | 3.0 |
|  | M175-13 | 19 | Root | 11.8–13.0 | 12.4 | −7.0 | 10.2 | 41.8 | 16.0 | 3.1 |
|  | radius | M175-a |  |  | 10–20 before death |  | −8.4 | 9.2 | 43.9 | 14.7 | 3.5 |
|  | rib | M175-b |  |  | 2–5 before death |  | −7.0 | 9.2 | 39.1 | 14.2 | 3.2 |
| M2 | Upper right first molar (URM1) | M2-1 | 1 | Crown | 0.3–0.9 | 0.6 | −6.8 | 13.7 | 42.3 | 16.0 | 3.1 |
|  | M2-2 | 2 | Crown | 0.9–1.6 | 1.3 | −6.9 | 13.1 | 42.0 | 15.8 | 3.1 |
|  | M2-3 | 3 | Crown | 1.6–2.2 | 1.9 | −6.8 | 12.0 | 42.2 | 16.2 | 3.0 |
|  | M2-4 | 4 | Crown | 2.2–2.9 | 2.6 | −7.3 | 10.7 | 42.3 | 16.3 | 3.0 |
|  | M2-5 | 5 | Crown | 2.9–3.5 | 3.2 | −7.5 | 9.7 | 42.2 | 16.3 | 3.0 |
|  | M2-6 | 6 | Root | 3.5–4.0 | 3.8 | −7.9 | 9.3 | 42.0 | 16.1 | 3.0 |
|  | M2-7 | 8 | Root | 4.0–4.9 | 4.5 | −7.5 | 9.2 | 42.0 | 16.2 | 3.0 |
|  | M2-8 | 10 | Root | 4.9–5.8 | 5.4 | −7.2 | 10.1 | 42.0 | 16.1 | 3.1 |
|  | M2-9 | 12 | Root | 5.8–6.7 | 6.3 | −7.0 | 10.5 | 41.9 | 15.9 | 3.1 |
|  | M2-10 | 14 | Root | 6.7–7.7 | 7.2 | −7.8 | 10.1 | 42.1 | 15.8 | 3.1 |
|  | M2-11 | 16 | Root | 7.7–8.6 | 8.2 | −8.4 | 10.7 | 41.6 | 15.6 | 3.1 |
|  | ulna | M2-a |  |  | 10–20 before death |  | −7.1 | 8.1 | 39.4 | 14.3 | 3.2 |
|  | rib | M2-b |  |  | 2–5 before death |  | −7.5 | 7.8 | 38.2 | 13.9 | 3.2 |
| M63 | Upper left first molar (ULM1) | M63-1 | 1 | Crown | 0.3–0.9 | 0.6 | −8.0 | 10.7 | 41.9 | 16.0 | 3.1 |
|  | M63-2 | 2 | Crown | 0.9–1.6 | 1.3 | −7.9 | 10.3 | 42.2 | 16.0 | 3.1 |
|  | M63-3 | 3 | Crown | 1.6–2.2 | 1.9 | −7.5 | 10.0 | 40.9 | 15.6 | 3.0 |
|  | M63-4 | 4 | Crown | 2.2–2.9 | 2.6 | −8.1 | 9.9 | 41.7 | 15.9 | 3.1 |
|  | M63-5 | 5 | Crown | 2.9–3.5 | 3.2 | −7.8 | 9.4 | 41.3 | 15.8 | 3.0 |
|  | M63-6 | 6 | Root | 3.5–4.0 | 3.8 | −5.7 | 9.8 | 42.3 | 14.8 | 3.3 |
|  | M63-7 | 8 | Root | 4.0–4.9 | 4.5 | −6.8 | 9.9 | 41.5 | 14.3 | 3.4 |
|  | M63-8 | 10 | Root | 4.9–5.8 | 5.4 | −7.2 | 9.8 | 41.4 | 14.5 | 3.3 |
|  | M63-9 | 12 | Root | 5.8–6.7 | 6.3 | −7.5 | 10.0 | 41.9 | 14.6 | 3.4 |
|  | M63-10 | 14 | Root | 6.7–7.7 | 7.2 | −7.8 | 10.1 | 41.6 | 14.4 | 3.4 |
|  | M63-11 | 16 | Root | 7.7–8.6 | 8.2 | −7.5 | 10.5 | 41.1 | 14.2 | 3.4 |
|  | ulna | M63-a |  |  | 10–20 before death |  | −7.4 | 8.9 | 39.9 | 14.2 | 3.3 |
|  | rib | M63-b |  |  | 2–5 before death |  | −7.3 | 9.1 | 39.8 | 14.2 | 3.3 |
| M67 | Upper left first molar (ULM1) | M67-1 | 1 | Crown | 0.9–1.6 | 1.3 | −15.7 | 13.9 | 41.2 | 15.2 | 3.2 |
|  | M67-2 | 2 | Crown | 1.6–2.2 | 1.9 | −15.1 | 12.2 | 40.4 | 14.7 | 3.2 |
|  | M67-3 | 3 | Crown | 2.2–2.9 | 2.6 | −15.8 | 12.5 | 41.4 | 15.5 | 3.1 |
|  | M67-4 | 4 | Crown | 2.9–3.5 | 3.2 | −15.9 | 12.5 | 41.2 | 15.2 | 3.2 |
|  | M67-5 | 5 | Root | 3.5–4.0 | 3.8 | −16.0 | 11.8 | 40.2 | 15.0 | 3.1 |
|  | M67-6 | 6 | Root | 4.0–4.6 | 4.3 | −17.0 | 11.8 | 40.2 | 14.8 | 3.2 |
|  | M67-7 | 7 | Root | 4.6–5.1 | 4.9 | −17.6 | 11.9 | 41.3 | 15.2 | 3.2 |
|  | M67-8 | 9 | Root | 5.1–6.2 | 5.7 | −17.1 | 12.1 | 42.1 | 15.1 | 3.2 |
|  | M67-9 | 11 | Root | 6.2–7.3 | 6.8 | −17.3 | 11.9 | 41.9 | 14.8 | 3.3 |
|  | M67-10 | 13 | Root | 7.3–8.4 | 7.9 | −17.2 | 11.4 | 42.5 | 14.5 | 3.4 |
|  | M67-11 | 15 | Root | 8.4–9.5 | 9.0 | −16.3 | 11.2 | 42.3 | 14.6 | 3.4 |
|  | ulna | M67-a |  |  | 10–20 before death |  | −11.5 | 10.1 | 41.9 | 14.8 | 3.3 |
|  | rib | M67-b |  |  | 2–5 before death |  | −7.9 | 9.4 | 39.9 | 14.5 | 3.2 |
| M118 | Upper right first molar (URM1) | M118-1 | 1 | Crown | 0.3–0.9 | 0.6 | −8.1 | 11.8 | 41.6 | 14.3 | 3.4 |
|  | M118-2 | 2 | Crown | 0.9–1.6 | 1.3 | −8.4 | 10.5 | 42.2 | 14.8 | 3.3 |
|  | M118-3 | 3 | Crown | 1.6–2.2 | 1.9 | −9.0 | 10.3 | 41.9 | 14.8 | 3.3 |
|  | M118-4 | 4 | Crown | 2.2–2.9 | 2.6 | −9.5 | 9.7 | 42.7 | 15.1 | 3.3 |
|  | M118-5 | 5 | Crown | 2.9–3.5 | 3.2 | −10.2 | 9.5 | 42.5 | 15.0 | 3.3 |
|  | M118-6 | 6 | Root | 3.5–4.0 | 3.8 | −11.4 | 9.2 | 42.2 | 15.0 | 3.3 |
|  | M118-7 | 8 | Root | 4.0–4.9 | 4.5 | −10.2 | 9.1 | 43.0 | 15.4 | 3.3 |
|  | M118-8 | 10 | Root | 4.9–5.8 | 5.4 | −9.6 | 9.4 | 42.1 | 14.7 | 3.3 |
|  | M118-9 | 12 | Root | 5.8–6.7 | 6.3 | −9.1 | 9.3 | 42.0 | 15.0 | 3.3 |
|  | M118-10 | 14 | Root | 6.7–7.7 | 7.2 | −9.8 | 9.3 | 42.2 | 15.0 | 3.3 |
|  | M118-11 | 16 | Root | 7.7–8.6 | 8.2 | −10.2 | 9.5 | 42.5 | 14.9 | 3.3 |
|  | M118-12 | 18 | Root | 8.6–9.5 | 9.1 | −10.7 | 9.2 | 42.2 | 14.8 | 3.3 |
|  | ulna | M118-a |  |  | 10–20 before death |  | −9.2 | 8.0 | 40.3 | 14.7 | 3.2 |
|  | rib | M118-b |  |  | 2–5 before death |  | −8.9 | 8.9 | 39.7 | 14.4 | 3.2 |
| M163 | Lower left canine (LLC) | M163-1 | 1 | Crown | 1.7–2.4 | 2.1 | −16.2 | 11.3 | 41.8 | 14.5 | 3.3 |
|  | M163-2 | 2 | Crown | 2.4–3.2 | 2.8 | −16.7 | 12.1 | 42.2 | 14.4 | 3.4 |
|  | M163-3 | 3 | Crown | 3.2–4.0 | 3.6 | −18.3 | 12.0 | 42.4 | 14.9 | 3.3 |
|  | M163-4 | 4 | Crown | 4.0–4.7 | 4.4 | −18.4 | 12.0 | 42.1 | 14.7 | 3.3 |
|  | M163-5 | 5 | Crown | 4.7–5.5 | 5.1 | −17.7 | 11.7 | 42.0 | 14.7 | 3.3 |
|  | M163-6 | 6 | Root | 5.5–6.1 | 5.8 | −17.9 | 11.4 | 42.1 | 14.9 | 3.3 |
|  | M163-7 | 8 | Root | 6.1–7.2 | 6.7 | −17.5 | 11.2 | 42.1 | 15.0 | 3.3 |
|  | M163-8 | 10 | Root | 7.2–8.4 | 7.8 | −18.0 | 11.0 | 41.3 | 14.2 | 3.4 |
|  | M163-9 | 12 | Root | 8.4–9.5 | 9.0 | −17.5 | 10.7 | 41.3 | 14.4 | 3.3 |
|  | M163-10 | 14 | Root | 9.5–10.7 | 10.1 | −17.3 | 10.4 | 41.9 | 14.6 | 3.3 |
|  | M163-11 | 16 | Root | 10.7–11.8 | 11.3 | −16.6 | 10.3 | 42.0 | 14.6 | 3.4 |
|  | M163-12 | 18 | Root | 11.8–13.0 | 12.4 | −17.3 | 10.6 | 42.4 | 14.8 | 3.3 |
|  | ulna | M163-a |  |  | 10–20 before death |  | −9.9 | 9.8 | 41.5 | 14.9 | 3.2 |
|  | rib | M163-b |  |  | 2–5 before death |  | −8.8 | 10.1 | 43.7 | 15.6 | 3.3 |
| M167 | Upper left first molar (ULM1) | M167-1 | 1 | Crown | 0.3–0.9 | 0.6 | −8.4 | 15.2 | 42.6 | 14.5 | 3.4 |
|  | M167-2 | 2 | Crown | 0.9–1.6 | 1.3 | −8.1 | 13.9 | 42.0 | 14.8 | 3.3 |
|  | M167-3 | 3 | Crown | 1.6–2.2 | 1.9 | −8.6 | 13.5 | 42.0 | 14.7 | 3.3 |
|  | M167-4 | 4 | Crown | 2.2–2.9 | 2.6 | −9.5 | 12.5 | 42.2 | 15.1 | 3.3 |
|  | M167-5 | 5 | Crown | 2.9–3.5 | 3.2 | −10.0 | 12.1 | 42.0 | 14.6 | 3.4 |
|  | M167-6 | 6 | Root | 3.5–4.0 | 3.8 | −9.9 | 11.4 | 41.6 | 14.6 | 3.3 |
|  | M167-7 | 8 | Root | 4.0–4.9 | 4.5 | −9.1 | 11.6 | 41.6 | 14.6 | 3.3 |
|  | M167-8 | 10 | Root | 4.9–5.8 | 5.4 | −9.0 | 10.9 | 42.9 | 15.3 | 3.3 |
|  | M167-9 | 12 | Root | 5.8–6.7 | 6.3 | −9.0 | 10.2 | 42.3 | 14.7 | 3.4 |
|  | M167-10 | 14 | Root | 6.7–7.7 | 7.2 | −9.2 | 10.2 | 42.5 | 14.9 | 3.3 |
|  | M167-11 | 16 | Root | 7.7–8.6 | 8.2 | −10.5 | 9.7 | 43.7 | 14.3 | 3.6 |
|  | fibula | M167-a |  |  | 10–20 before death |  | −9.0 | 9.5 | 40.4 | 14.5 | 3.3 |
|  | rib | M167-b |  |  | 2–5 before death |  | −9.0 | 9.5 | 40.2 | 14.4 | 3.3 |

Notes: (1) Sample numbers starting with “M” corresponds to a burial;

(2) “Distance (mm)” represents the distance of the serial section from the crown;

(3) “Estimated age range (yrs)” represents the approximate age range that each serial section formed according to Beaumont and Montgomery (2015);

(4) “Estimated median age (yrs)” represents the approximate median age that each serial section formed according to Beaumont and Montgomery (2015);

(5) Values marked in red represent that the data could not be used because of insufficient collagen yield or an abnormal atomic C:N;

(6) Some time periods are missing in the longitudinal tooth data due to the crown wearing or root missing.

## **Table S2**

Statistical summary of carbon and nitrogen isotope values of human bone and dentin samples from the Jiaojia site and the reference faunal and crop isotope values from other sites.

| **Sites** | **Species** | **n** | ***δ*13**C (‰) | | | | | ***δ*15**N (‰) | | | | **References** |
| --- | --- | --- | --- | --- | --- | --- | --- | --- | --- | --- | --- | --- |
|  |  |  | **Min** | **Max** | **Mean** | **SD** | **Min** | | **Max** | **Mean** | **SD** |  |
| Jiaojia | Human dentin | 257 | −18.4 | −5.7 | −10.0 | 2.6 | 8.4 | | 15.2 | 10.8 | 1.2 | Current study |
|  | Human limb bone | 22 | −11.5 | −7.1 | −8.9 | 1.1 | 6.8 | | 10.4 | 9.2 | 0.9 |  |
|  | Human rib | 22 | −11.8 | −7.0 | −8.7 | 1.2 | 7.8 | | 10.3 | 9.3 | 0.6 |  |
|  | Human bone | 115 | −12.1 | −5.3 | −9.1 | 1.1 | 7.5 | | 11.4 | 9.4 | 0.8 | Liu et al., 2024 |
|  | Pig / Wild boar | 6 | −20.0 | −7.5 | −14.9 | 4.7 | 3.7 | | 8.0 | 5.4 | 1.3 |  |
| Tai’an Dawenkou | Deer | 7 | −21.5 | −19.7 | −20.6 | 0.6 | 1.5 | | 3.0 | 2.2 | 0.5 | Chen et al., 2019 |
| Liangwangcheng | Deer | 5 | −17.2 | −20.8 | −18.8 | 1.4 | 2.0 | | 7.2 | 4.1 | 2.2 | Dong et al., 2019 |
|  | Fish | 1 |  |  | −20.7 |  |  | |  | 6.6 |  |  |
| Dahecun | Rice | 5 | −26.0 | −24.9 | −25.3 | 0.4 | 5.2 | | 8.8 | 7.0 | 1.7 | Tao et al., 2022a, b |
|  | Soybean | 1 |  |  | −25.0 |  |  | |  | 2.4 |  |  |
|  | Foxtail millet | 29 | −11.2 | −8.8 | −9.3 | 0.4 | 2.3 | | 5.0 | 3.9 | 0.8 |  |
|  | Broomcorn millet | 6 | −10.3 | −9.7 | −9.9 | 0.3 | 1.4 | | 7.0 | 4.6 | 1.9 |  |

**Supplementary discussion**

*1. Diachronic changes from the early to late phases*

To investigate whether the weaning pattern and post-weaning diet of Jiaojia populations changed over time, we compared the trends and means of *δ*13C and *δ*15N values of incremental dentin between the early (n = 9) and late (n = 10) phase groups (**Table 4**; **Fig. S1**).

**
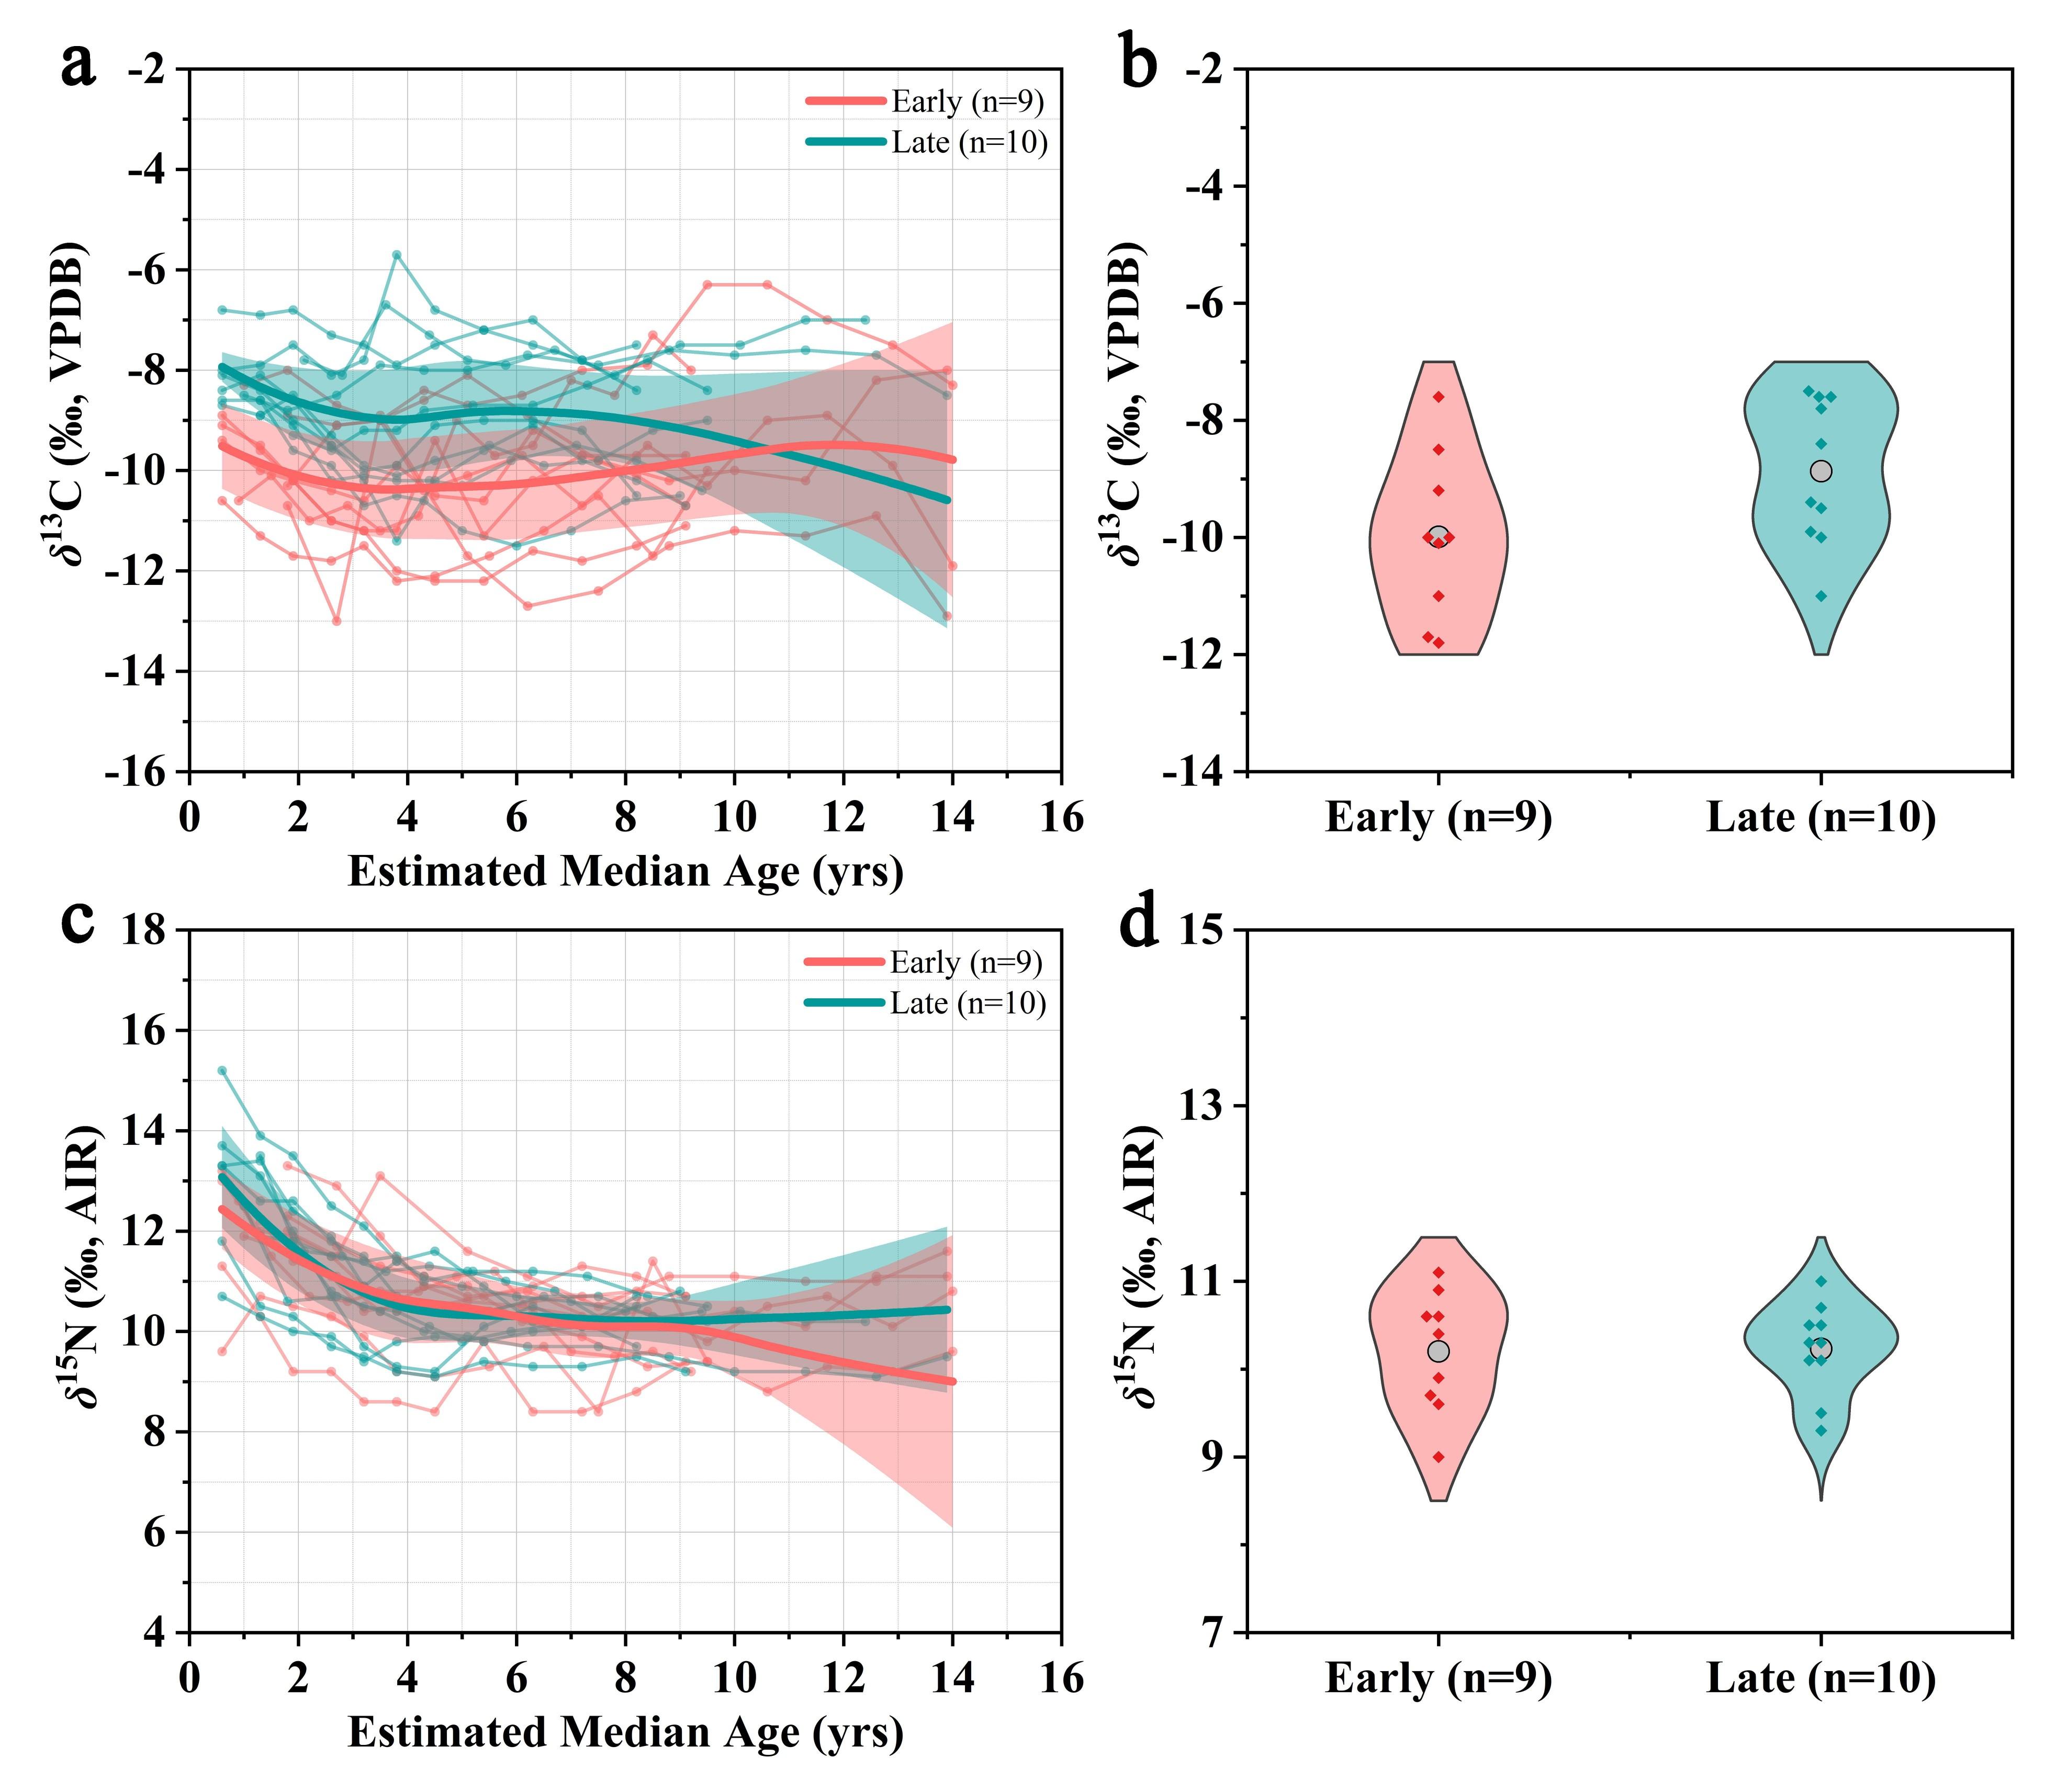
**

**Fig. S1.** Isotope profiles of *δ*13C (**a**) and *δ*15N (**c**) values of incremental dentin samples from early and late phases; violin plot of *δ*13C (**b**) and *δ*15N (**d**) values of dentin (post 5 years old) from early and late phases, the Jiaojia site. (Mean curves were estimated using the LOESS smoothing model, with shaded regions indicating 95% confidence intervals. Statistical significance was evaluated using Mann-Whitney U test at a significance level of 0.05. Asterisks denote statistical significance: * *p* ≤ 0.05; ** *p* ≤ 0.01).

According to the mean curves of the *δ*13C and *δ*15N values of incremental dentin, the decreasing trends of *δ*13C and *δ*15N values during weaning are quite similar between the two groups, so do the position of inflection point at weaning completion (**Fig. S1a**, **c**). However, the mean curves showed that the *δ*13C values of the late phase group were higher than those of the early phase group during the years before and after weaning (**Fig. S1a**).

On the other hand, the mean *δ*13C values of post-5-year-old dentin are higher during the late phase than the early phase (ca. 1.1‰) (**Table 4**; **Fig. S1b**). However, this change is not statistically significant (*p*= 0.07, Mann-Whitney U). The mean *δ*15N values of post-5-year-old dentin showed no statistically significant differences between the early and late phase (*p* = 0.89, Mann-Whitney U) (**Table 4**; **Fig. S1d**). Taken together, the Jiaojia people’s diet in childhood showed an increase in consumption of C4 foods from the early to late phases, which further supports the development of millet agriculture and the increasing contribution of millet as a weaning food.

*2. Comparison among different sex groups*

Previous isotope analysis of human bones from Jiaojia found that males and females consumed similar foods (Liu et al., 2024). To examine whether this pattern can be traced back to childhood, we compared the *δ*13C and *δ*15N values of incremental dentin among males (n = 6), females (n = 6), and sex unknown individuals (n = 7) (**Table 4**; **Fig. S2**).

**
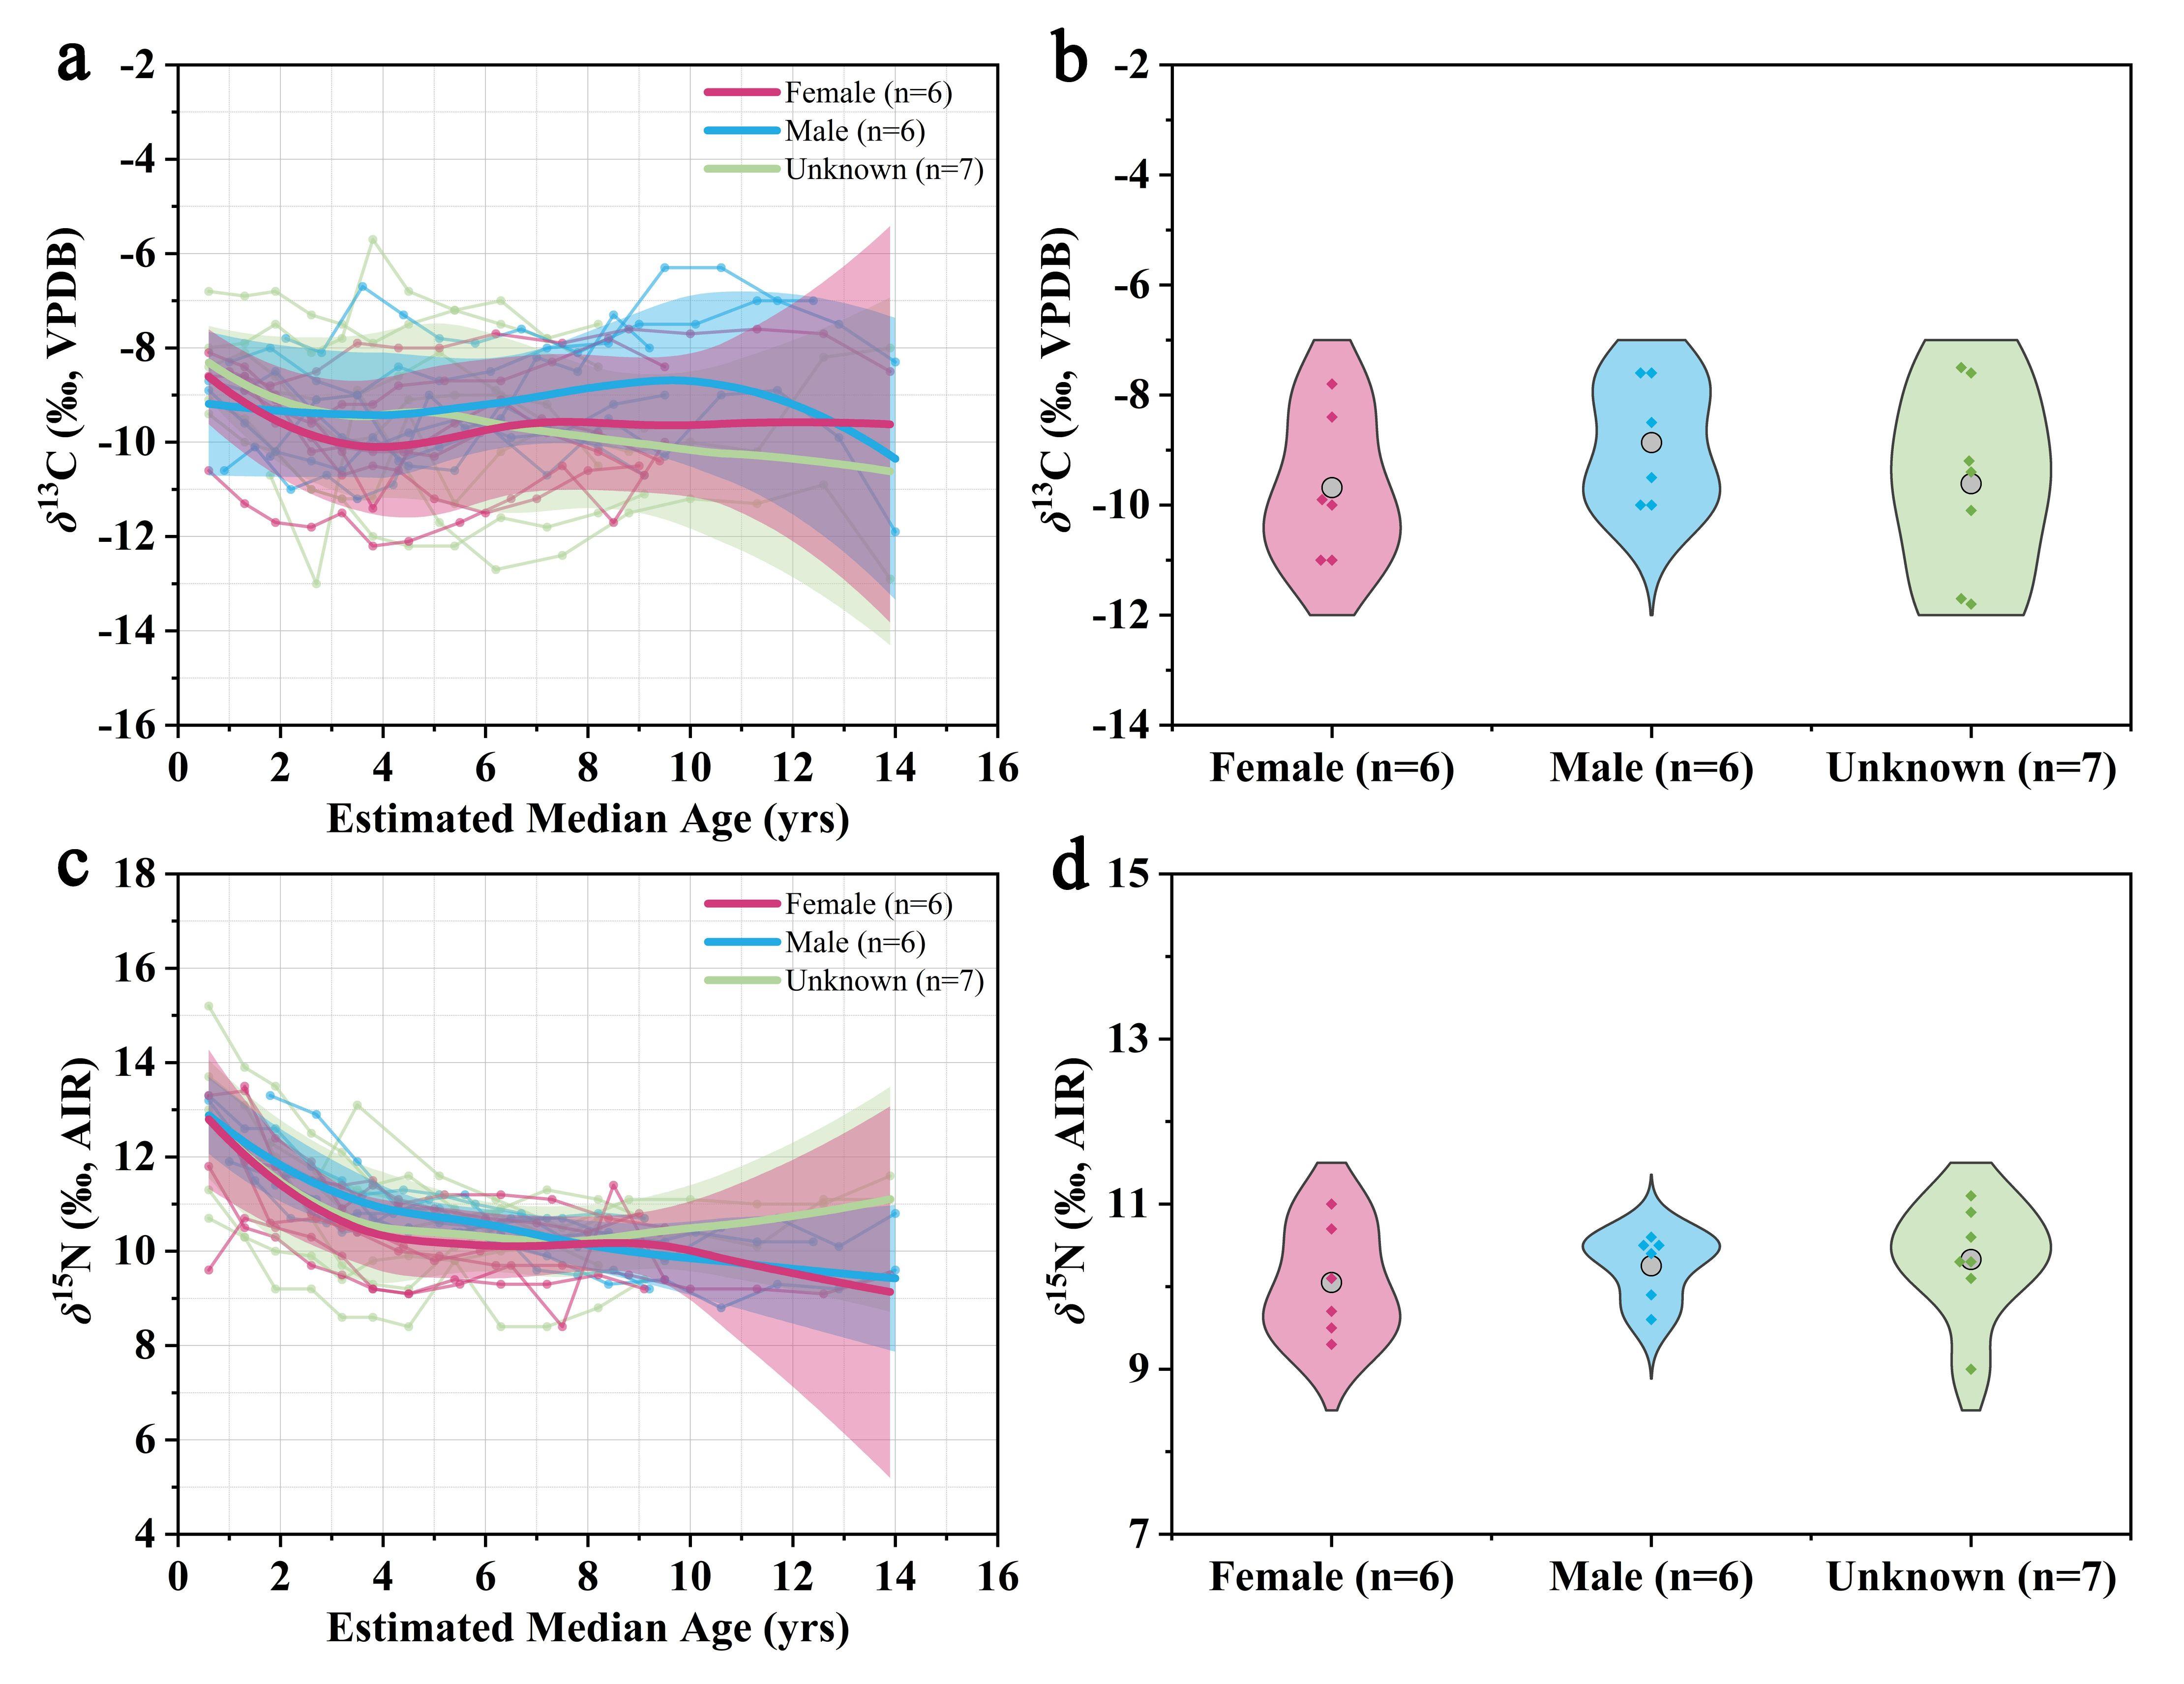
**

**Fig. S2.** Isotope profiles of *δ*13C (**a**) and *δ*15N (**c**) values of incremental dentin samples from different sex groups; violin plot of *δ*13C (**b**) and *δ*15N (**d**) values of dentin (post 5 years old) from different sex groups, the Jiaojia site. (Mean curves were estimated using the LOESS smoothing model, with shaded regions indicating 95% confidence intervals. Statistical significance was evaluated using Mann-Whitney U and Kruskal-Wallis tests at a significance level of 0.05. Asterisks denote statistical significance: * *p* ≤ 0.05; ** *p* ≤ 0.01).

The mean curves of *δ*13C values of incremental dentin showed that the *δ*13C values of males were generally slightly higher than those of females and that males had smaller decreases during weaning period (**Fig. S2a**). The mean *δ*13C values of post-5-year-old dentin increments from males were also higher (ca. 0.8‰) than those from females (**Table 4**; **Fig. S2b**). However, due to the small sample size and large variations among individuals, there is no statistically significant differences among sex groups (*p* = 0.60, Kruskal-Wallis). The mean curves of *δ*15N values of incremental dentin showed no differences among sex groups (**Fig. S2c**). Moreover, the mean *δ*15N values of post-5-year-old dentin increments also had no statistically significant differences among sex groups (*p* = 0.71, Kruskal-Wallis) (**Table 4**; **Fig. S2d**).

Previous studies of dietary and mortuary practices have argued that there were no dietary and socioeconomic inequalities between males and females from the Jiaojia site and some other sites of Dawenkou period (Chen et al., 2019; Dong et al., 2019; Liu et al., 2024), which is further supported by this current study. It is interesting to observe that Jiaojia males may have a preference for C4 weaning foods, but we caution that our sample size is small, and therefore, the isotope analysis of incremental dentin from more individuals is required to verify this hypothesis.
